# Supplementary material for: Visualization and Curve-Parameter Estimation Strategies for Efficient Exploration of Phenotype Microarray Kinetics
Source: PubMed Central journal article supplement (PMC3334903; doi:10.1371/journal.pone.0034846), 2012-04-20

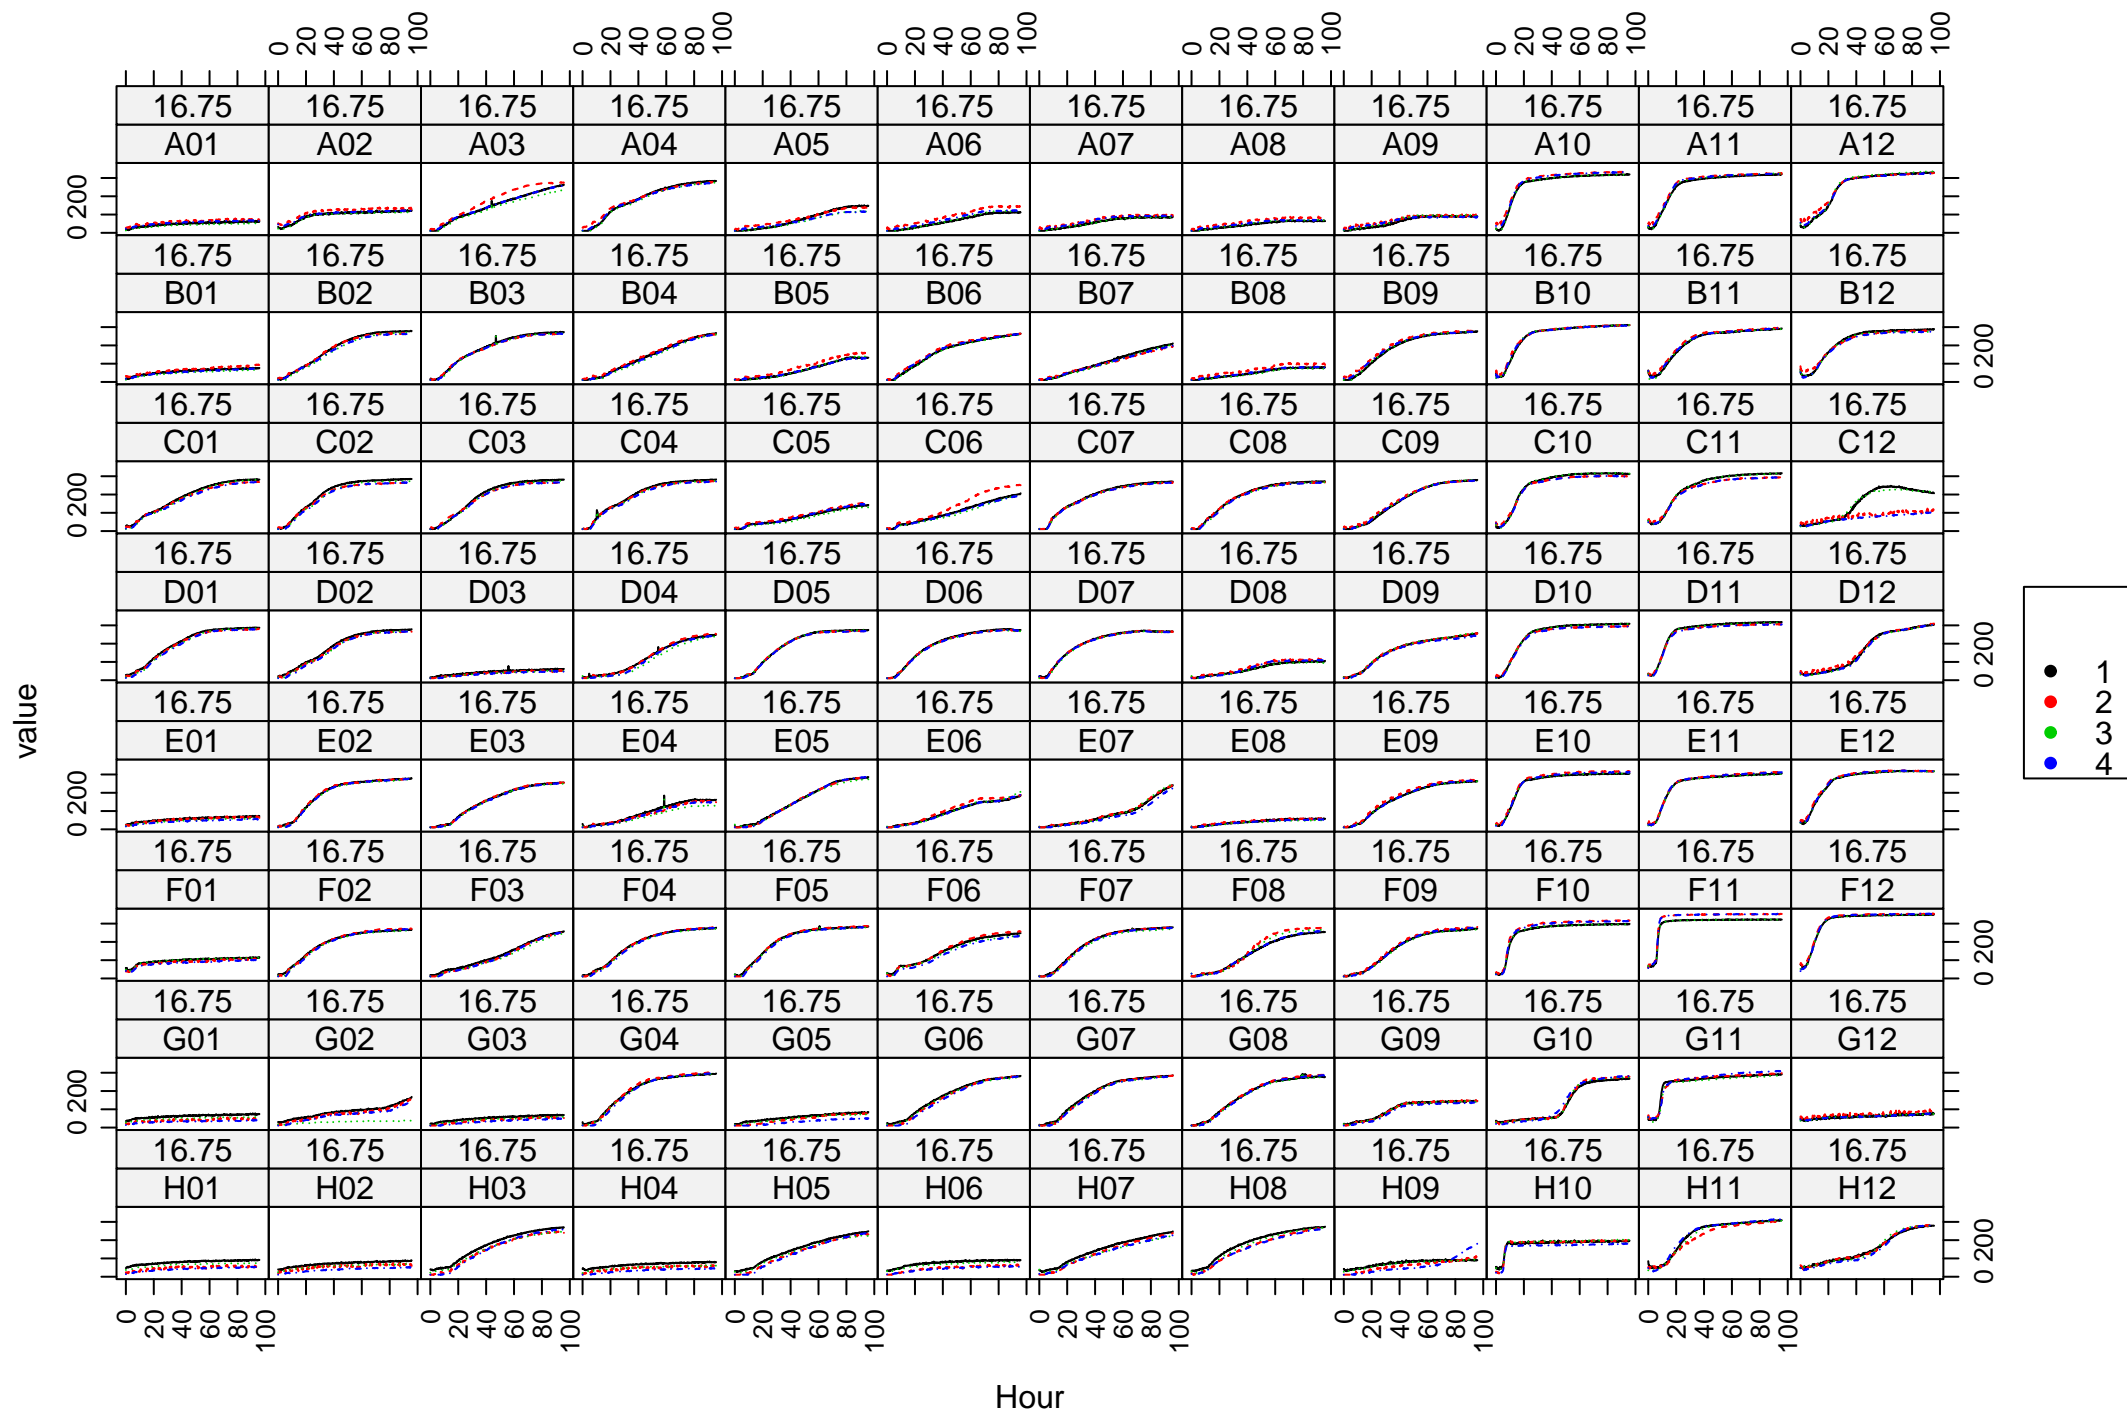

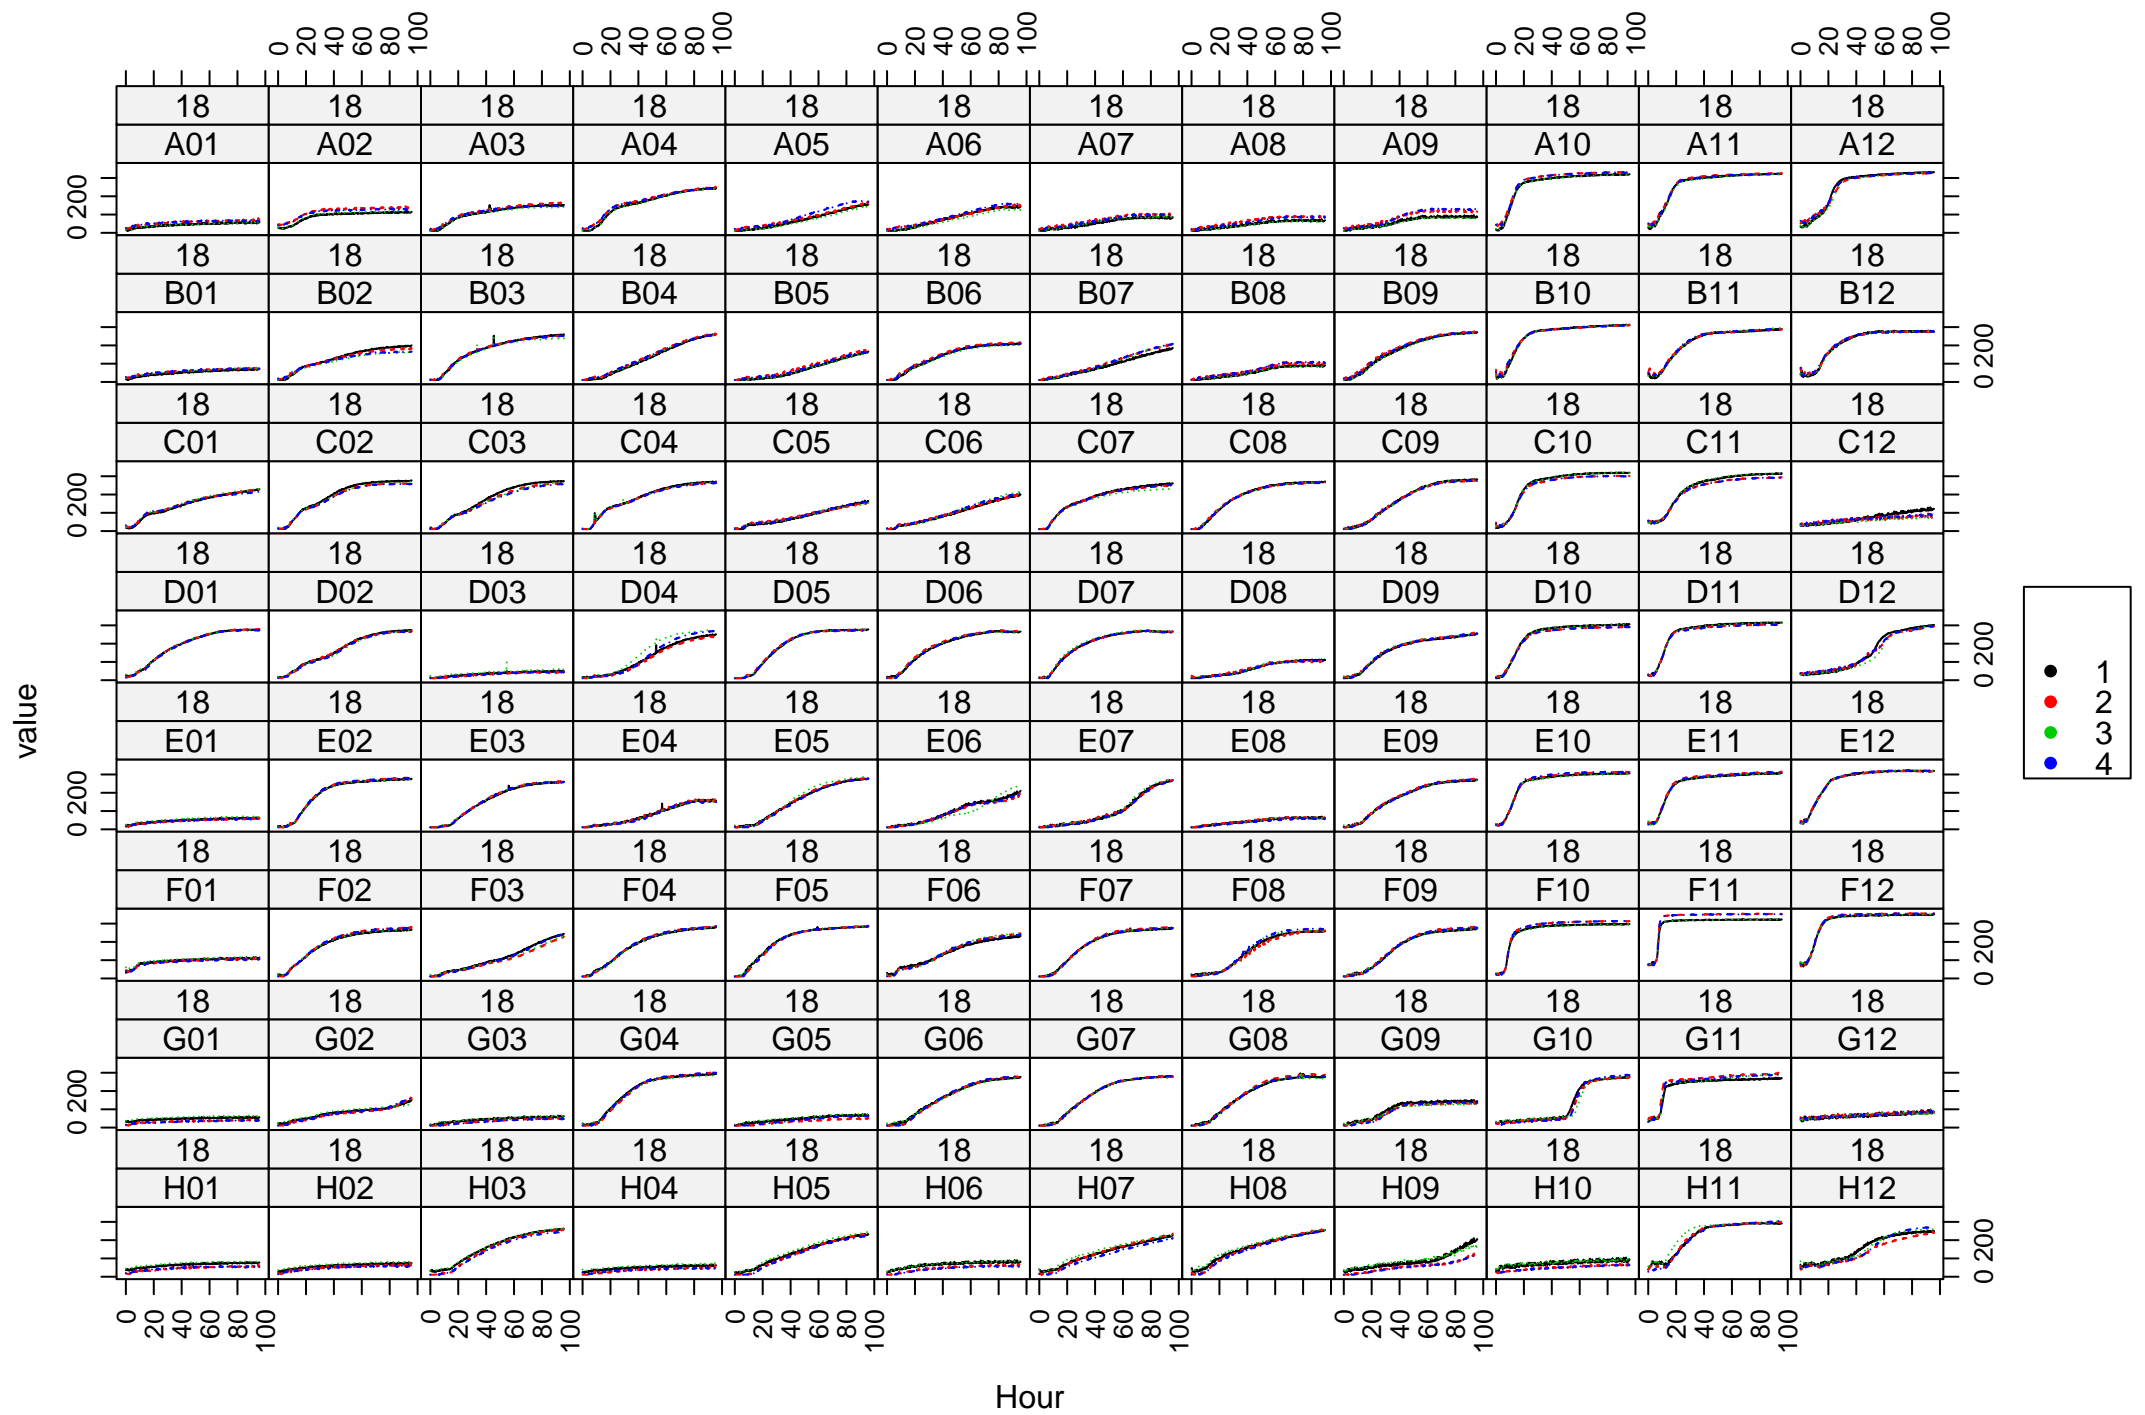

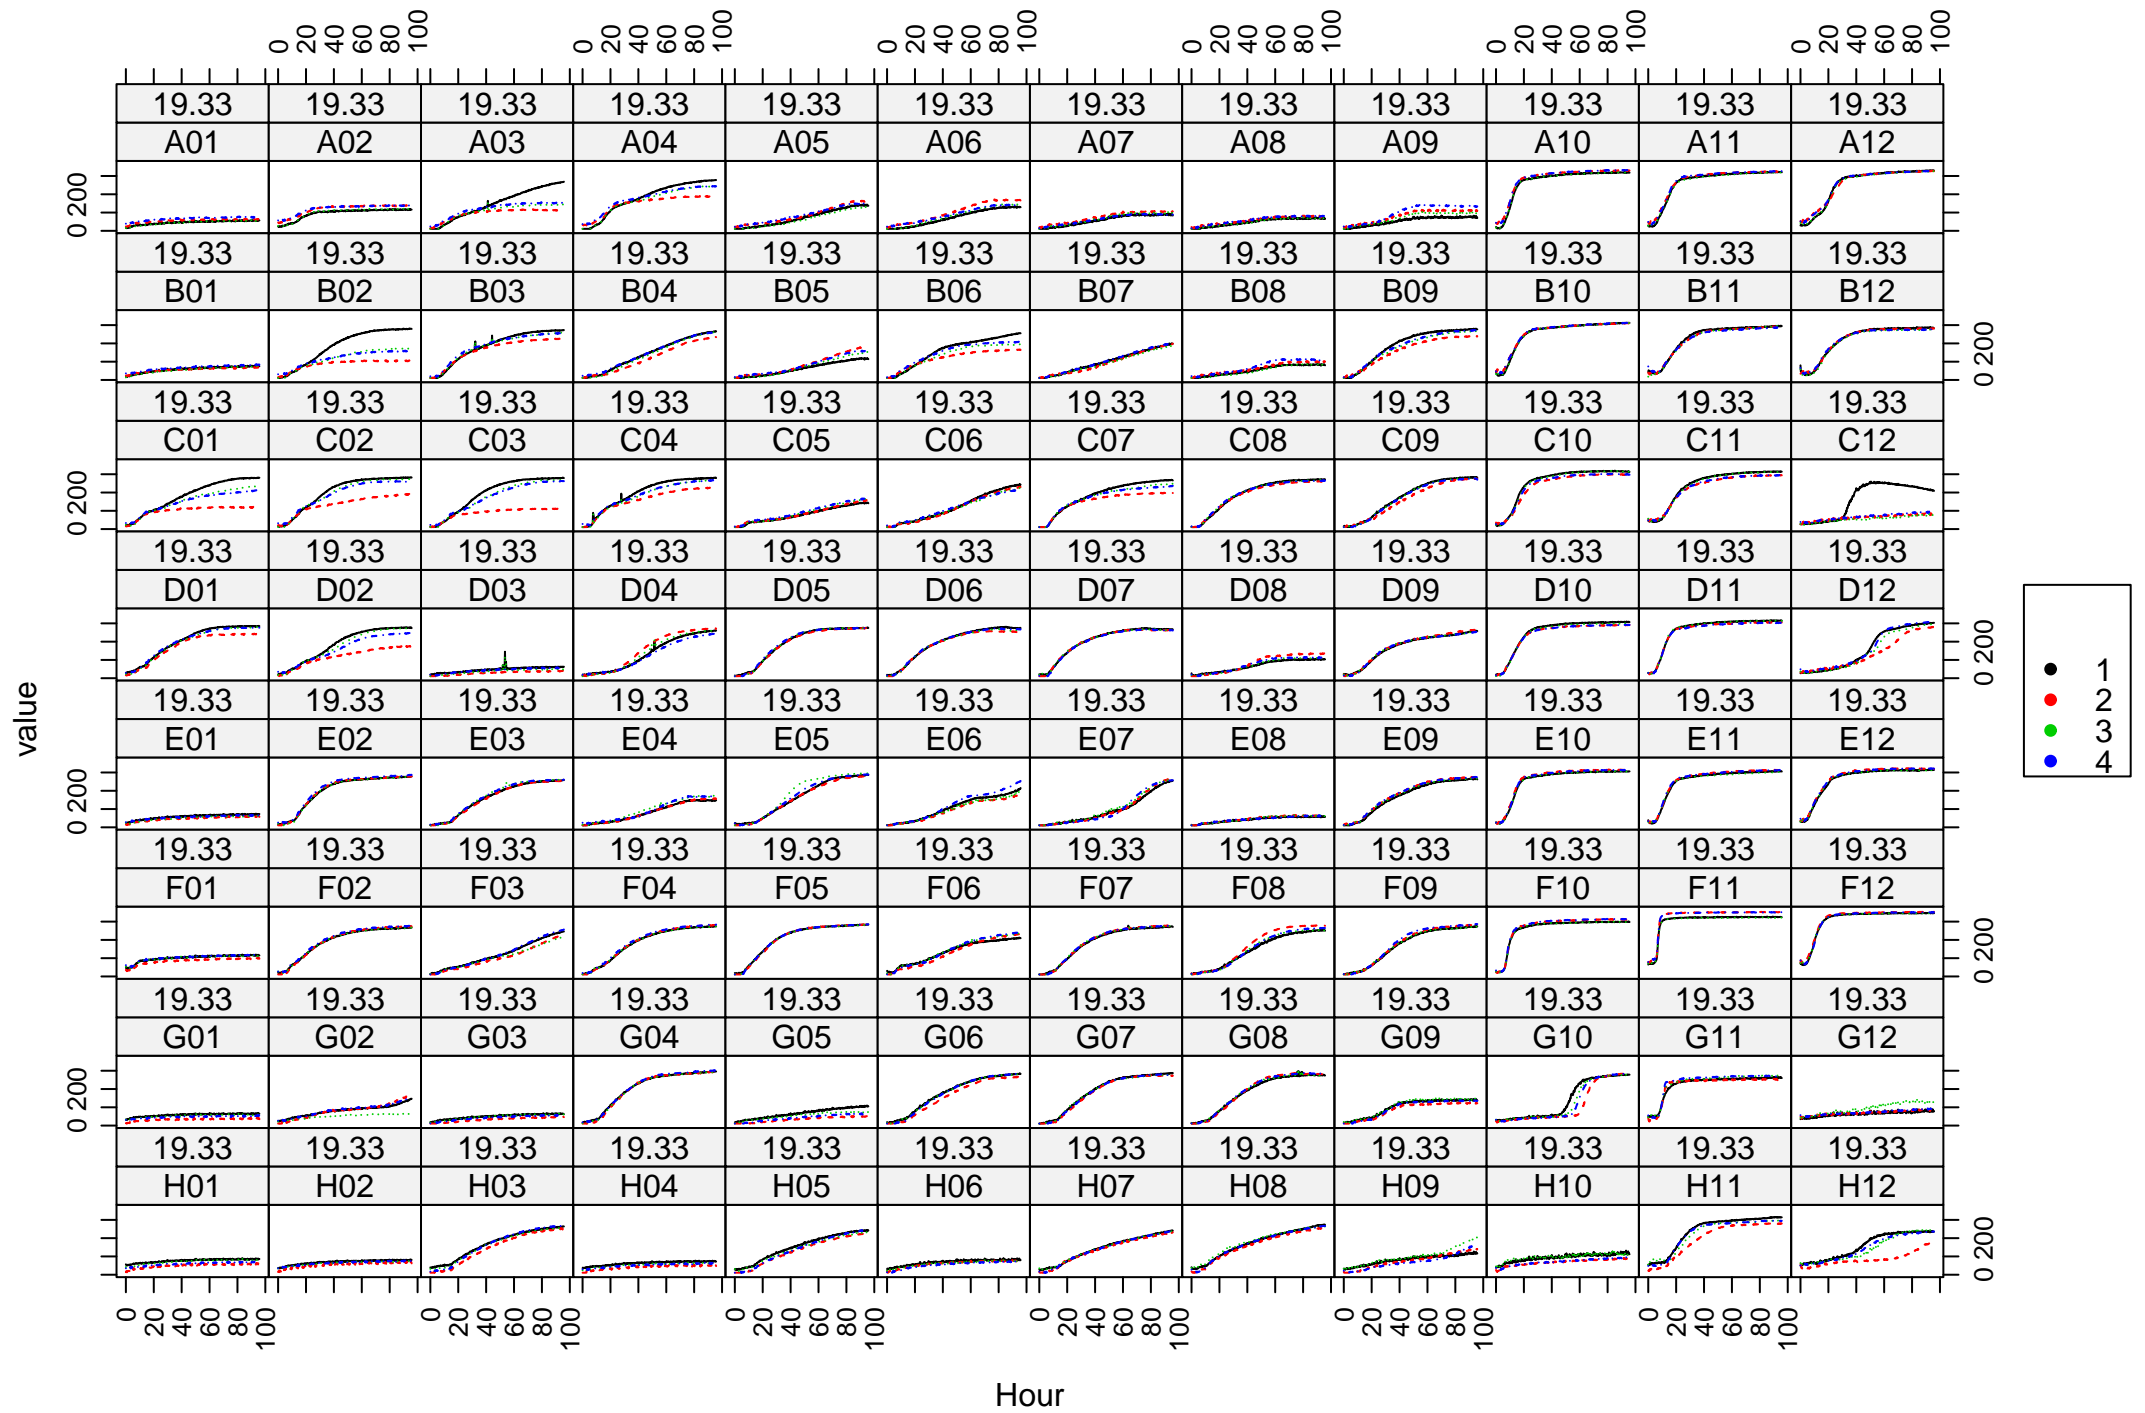

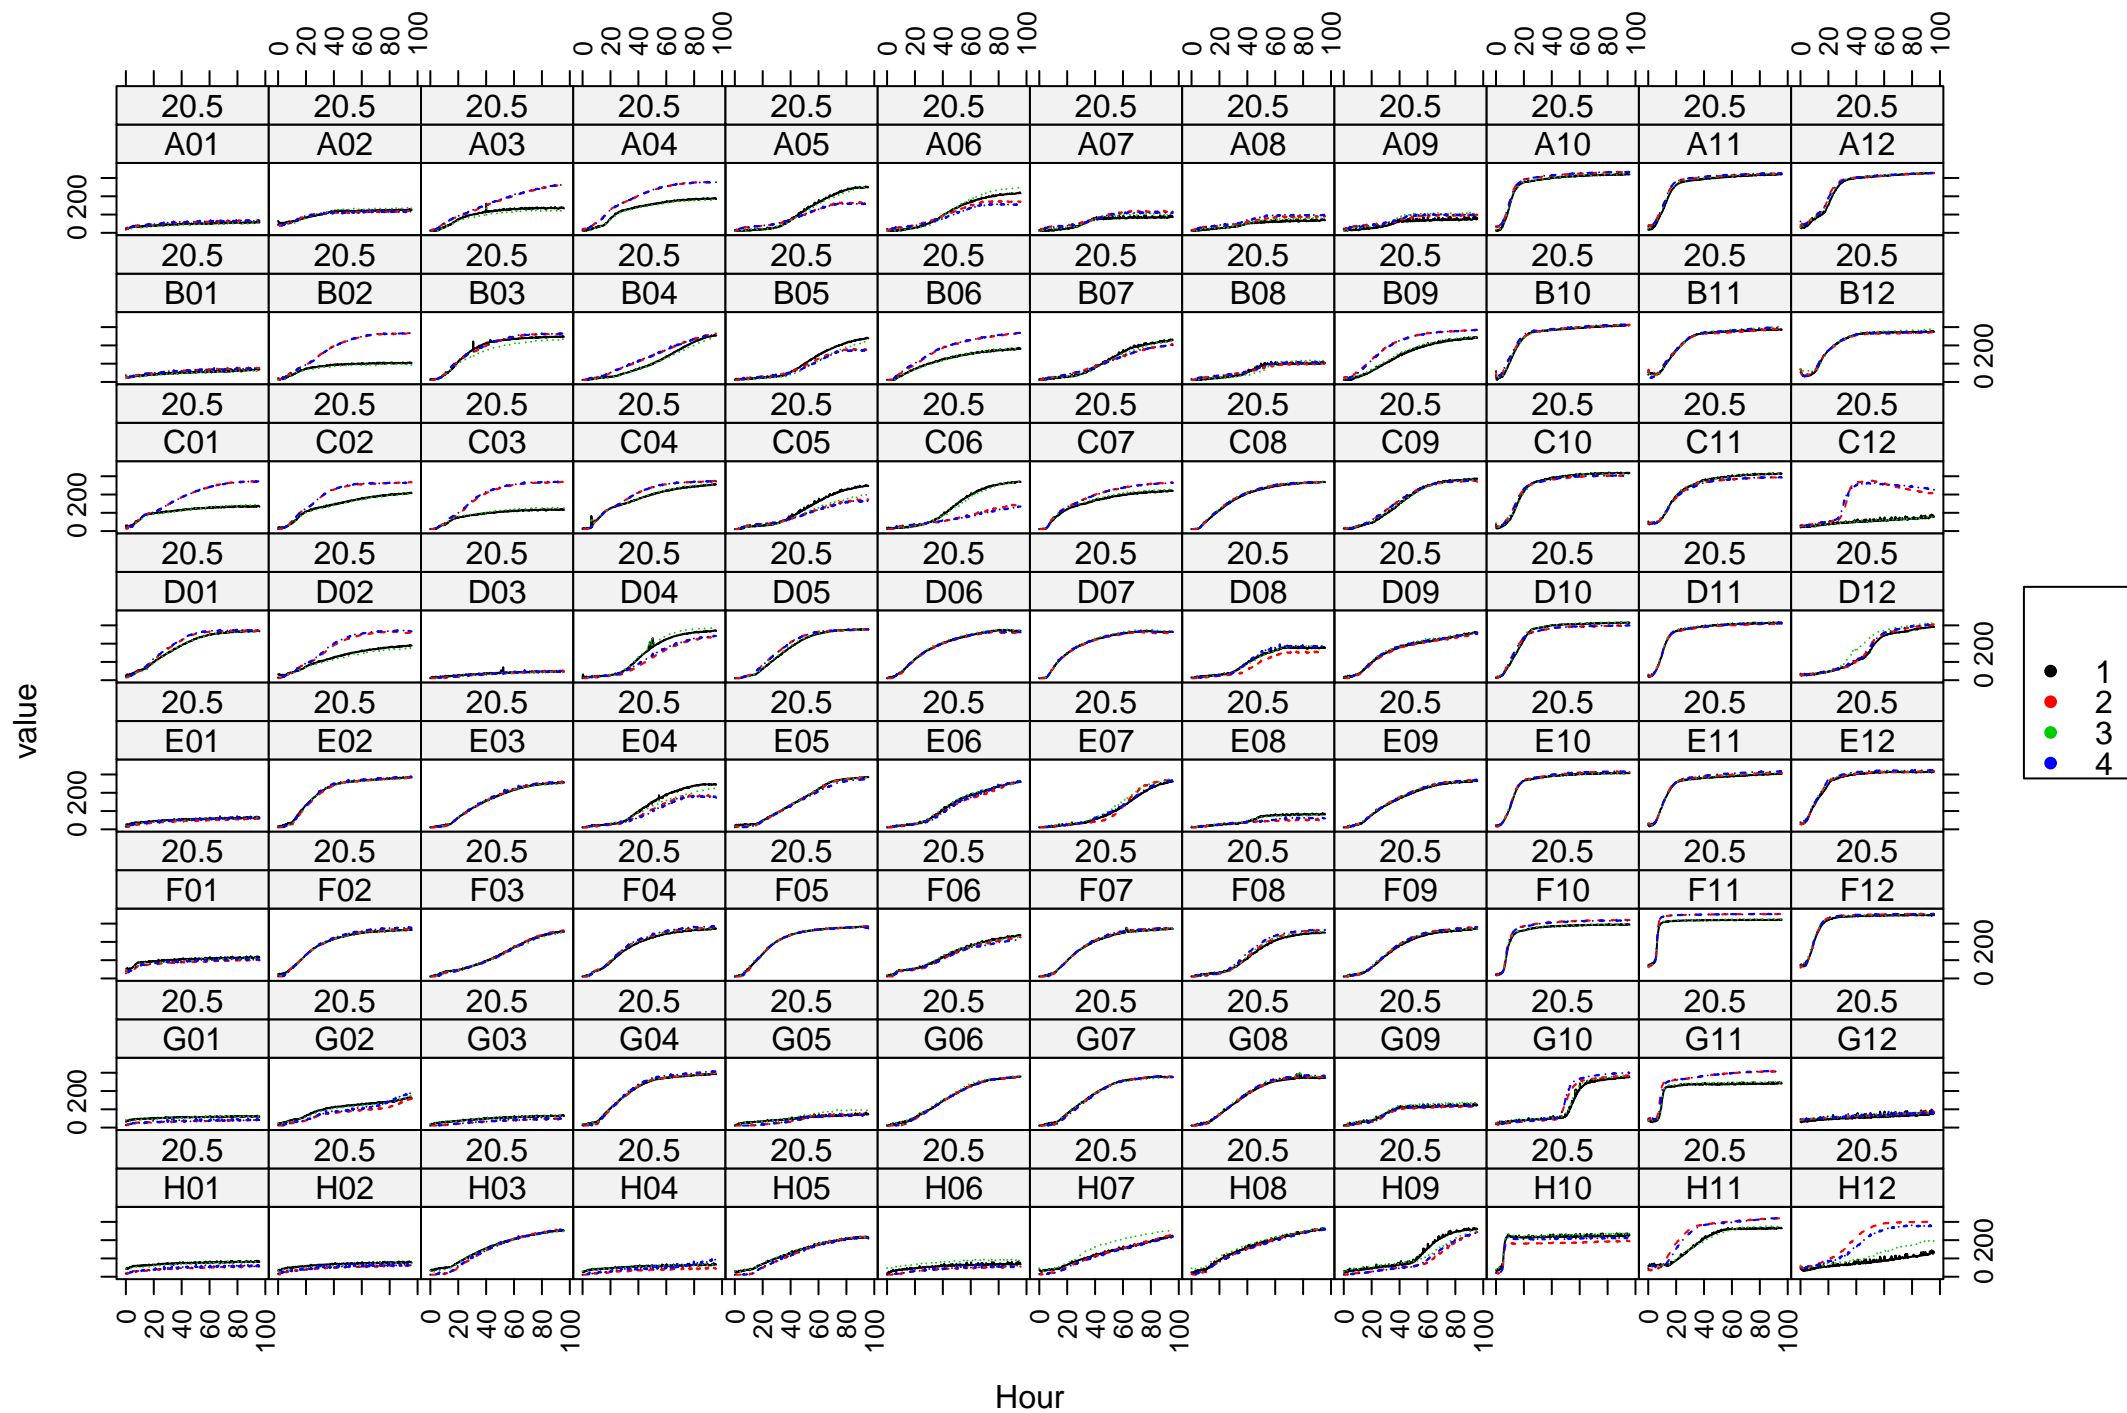

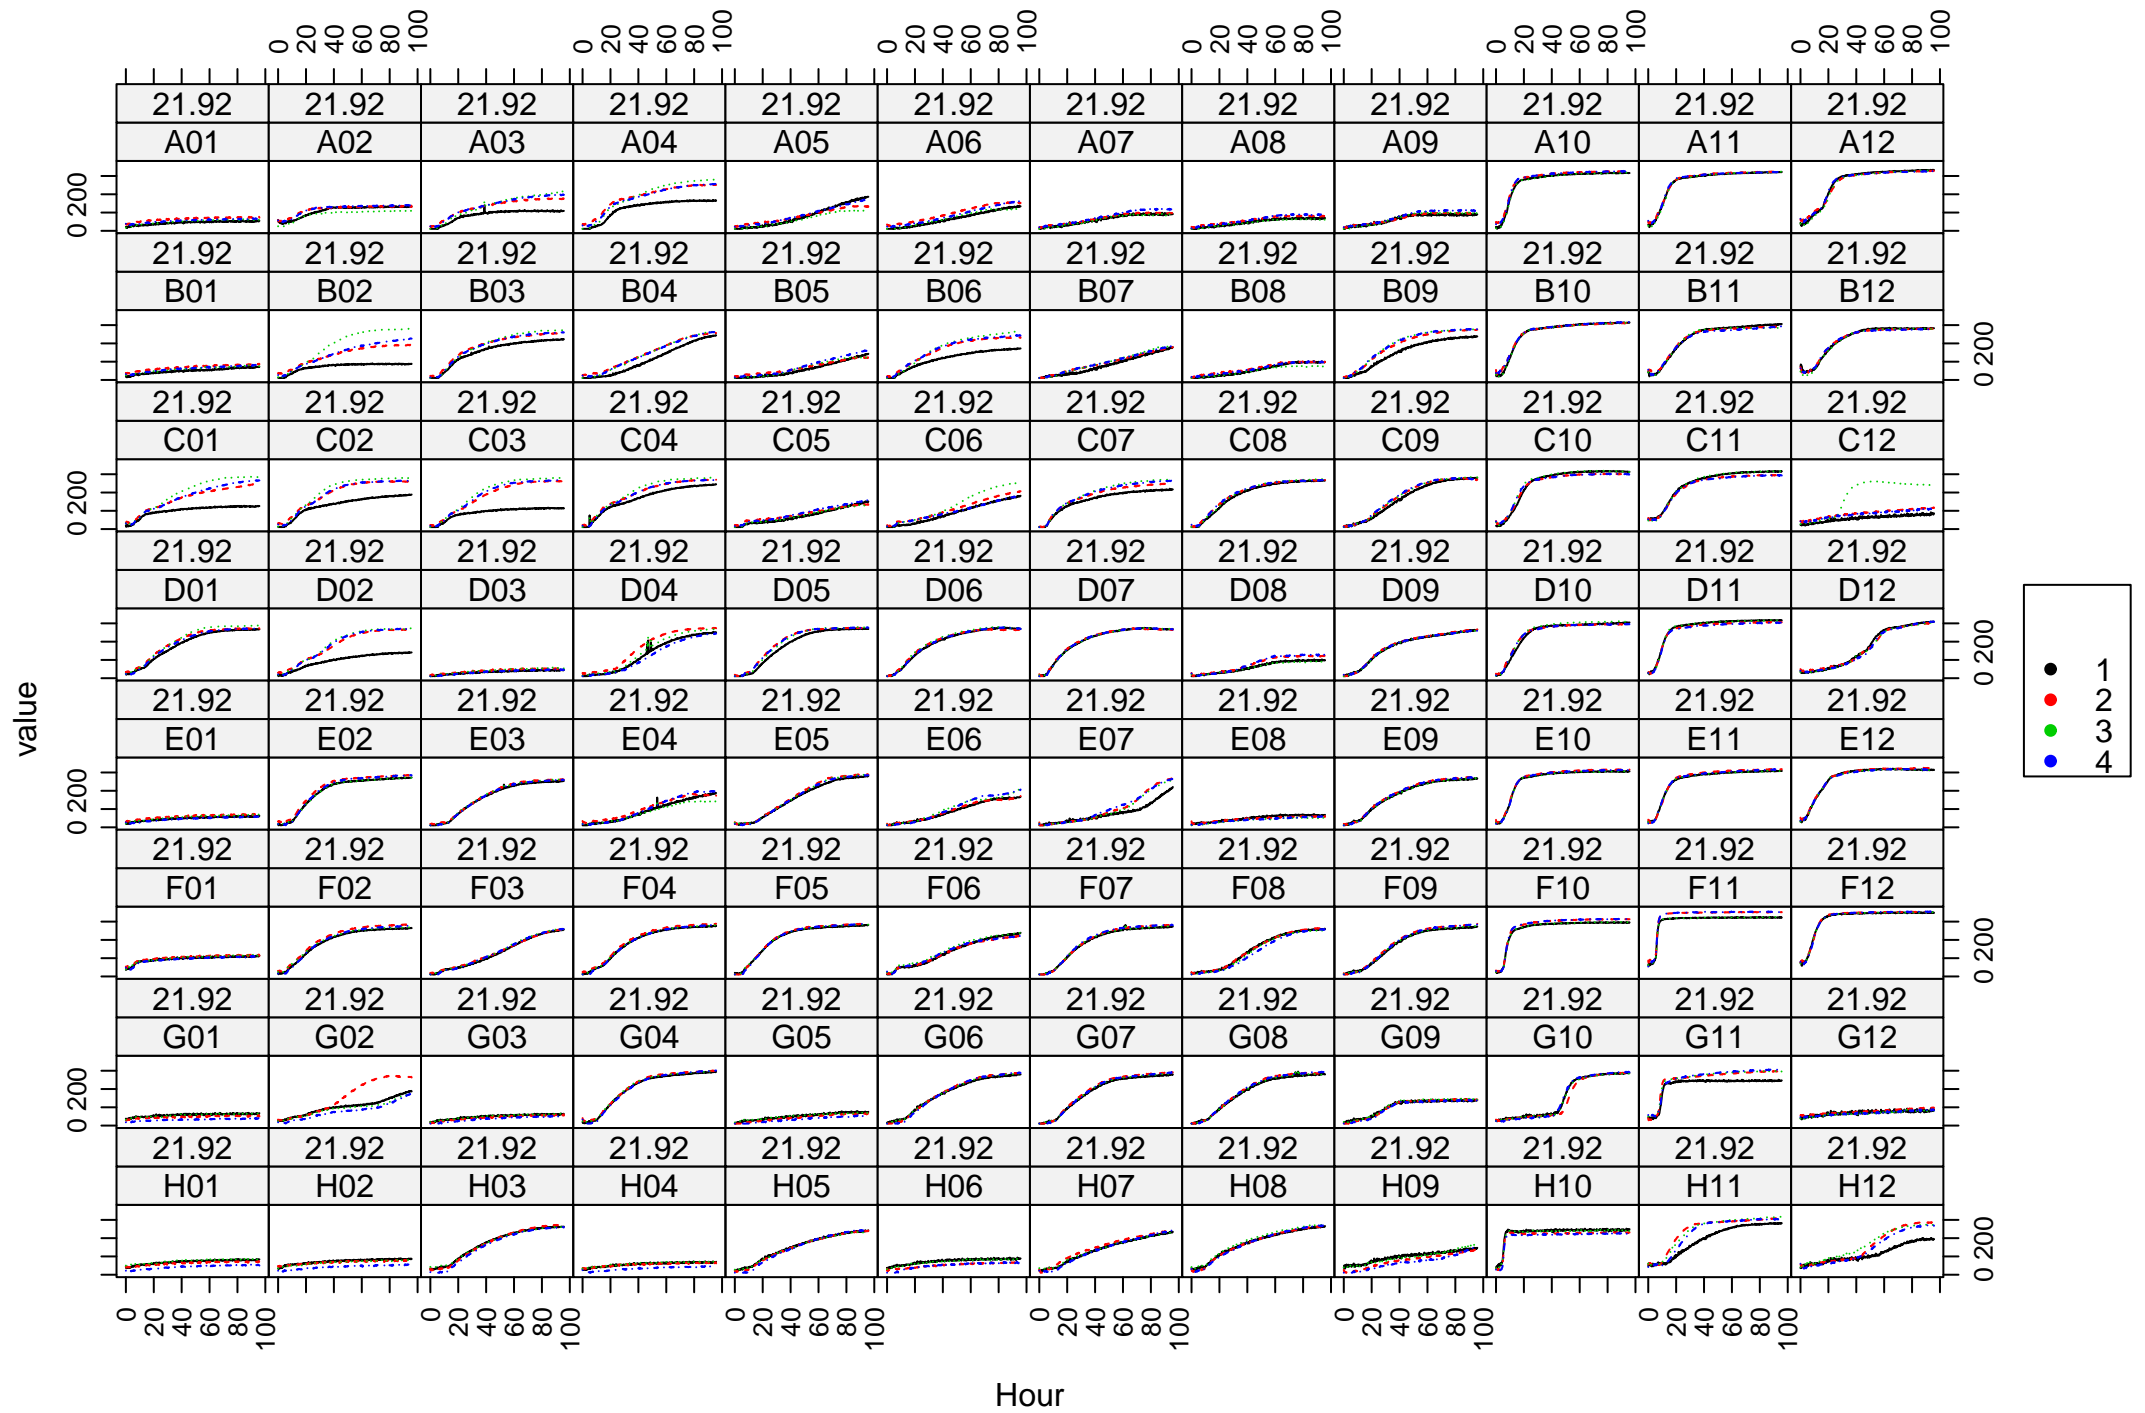

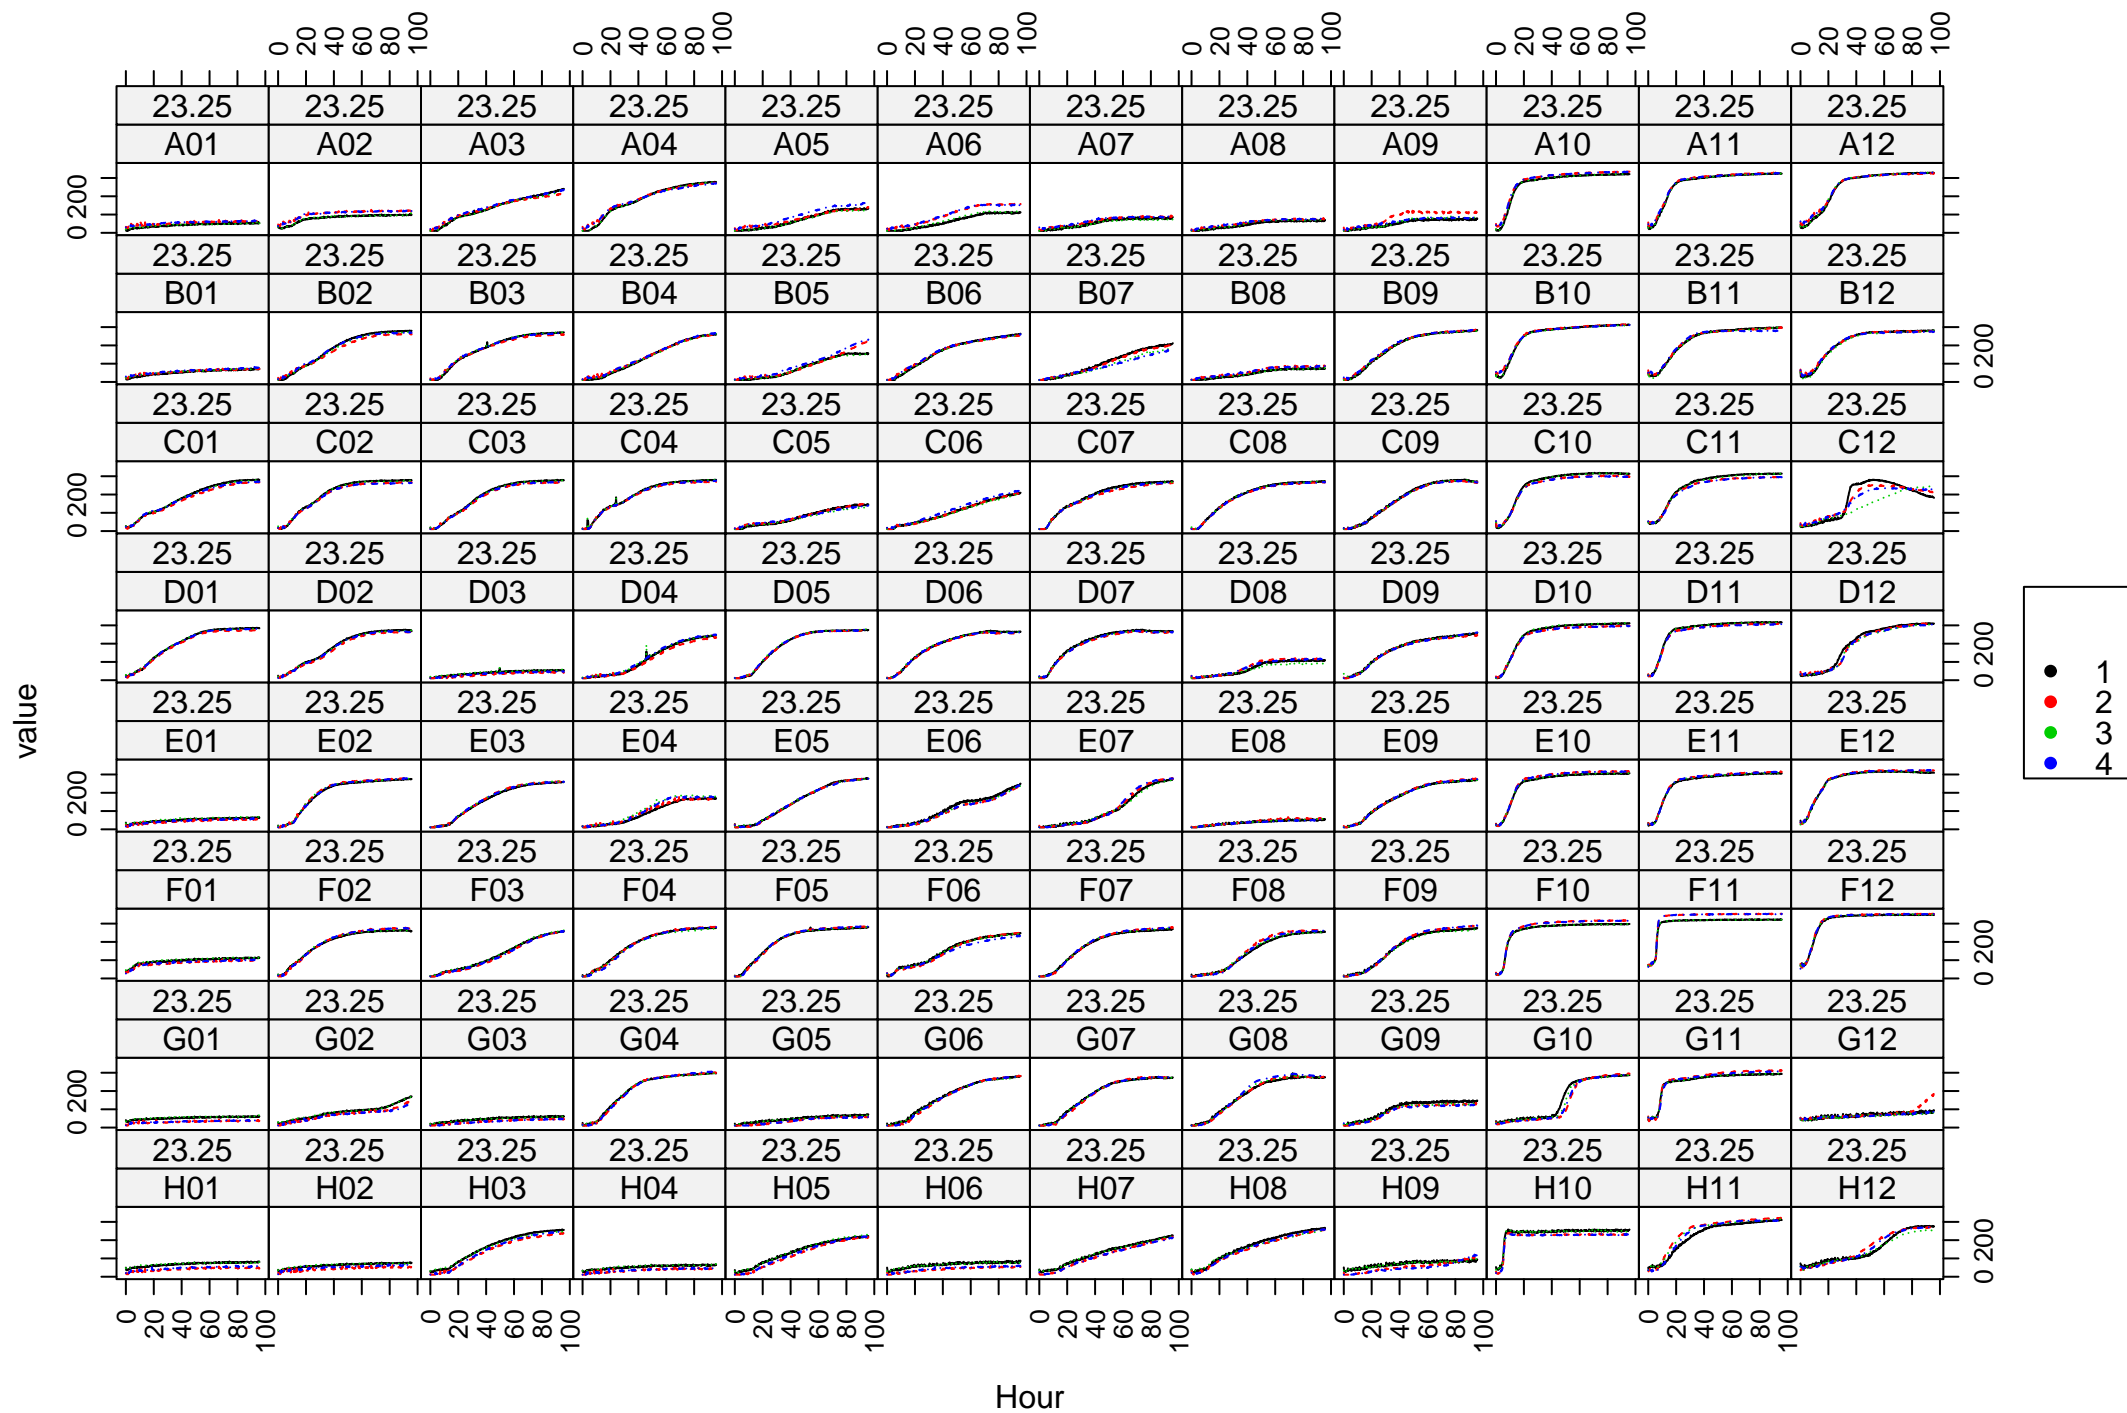

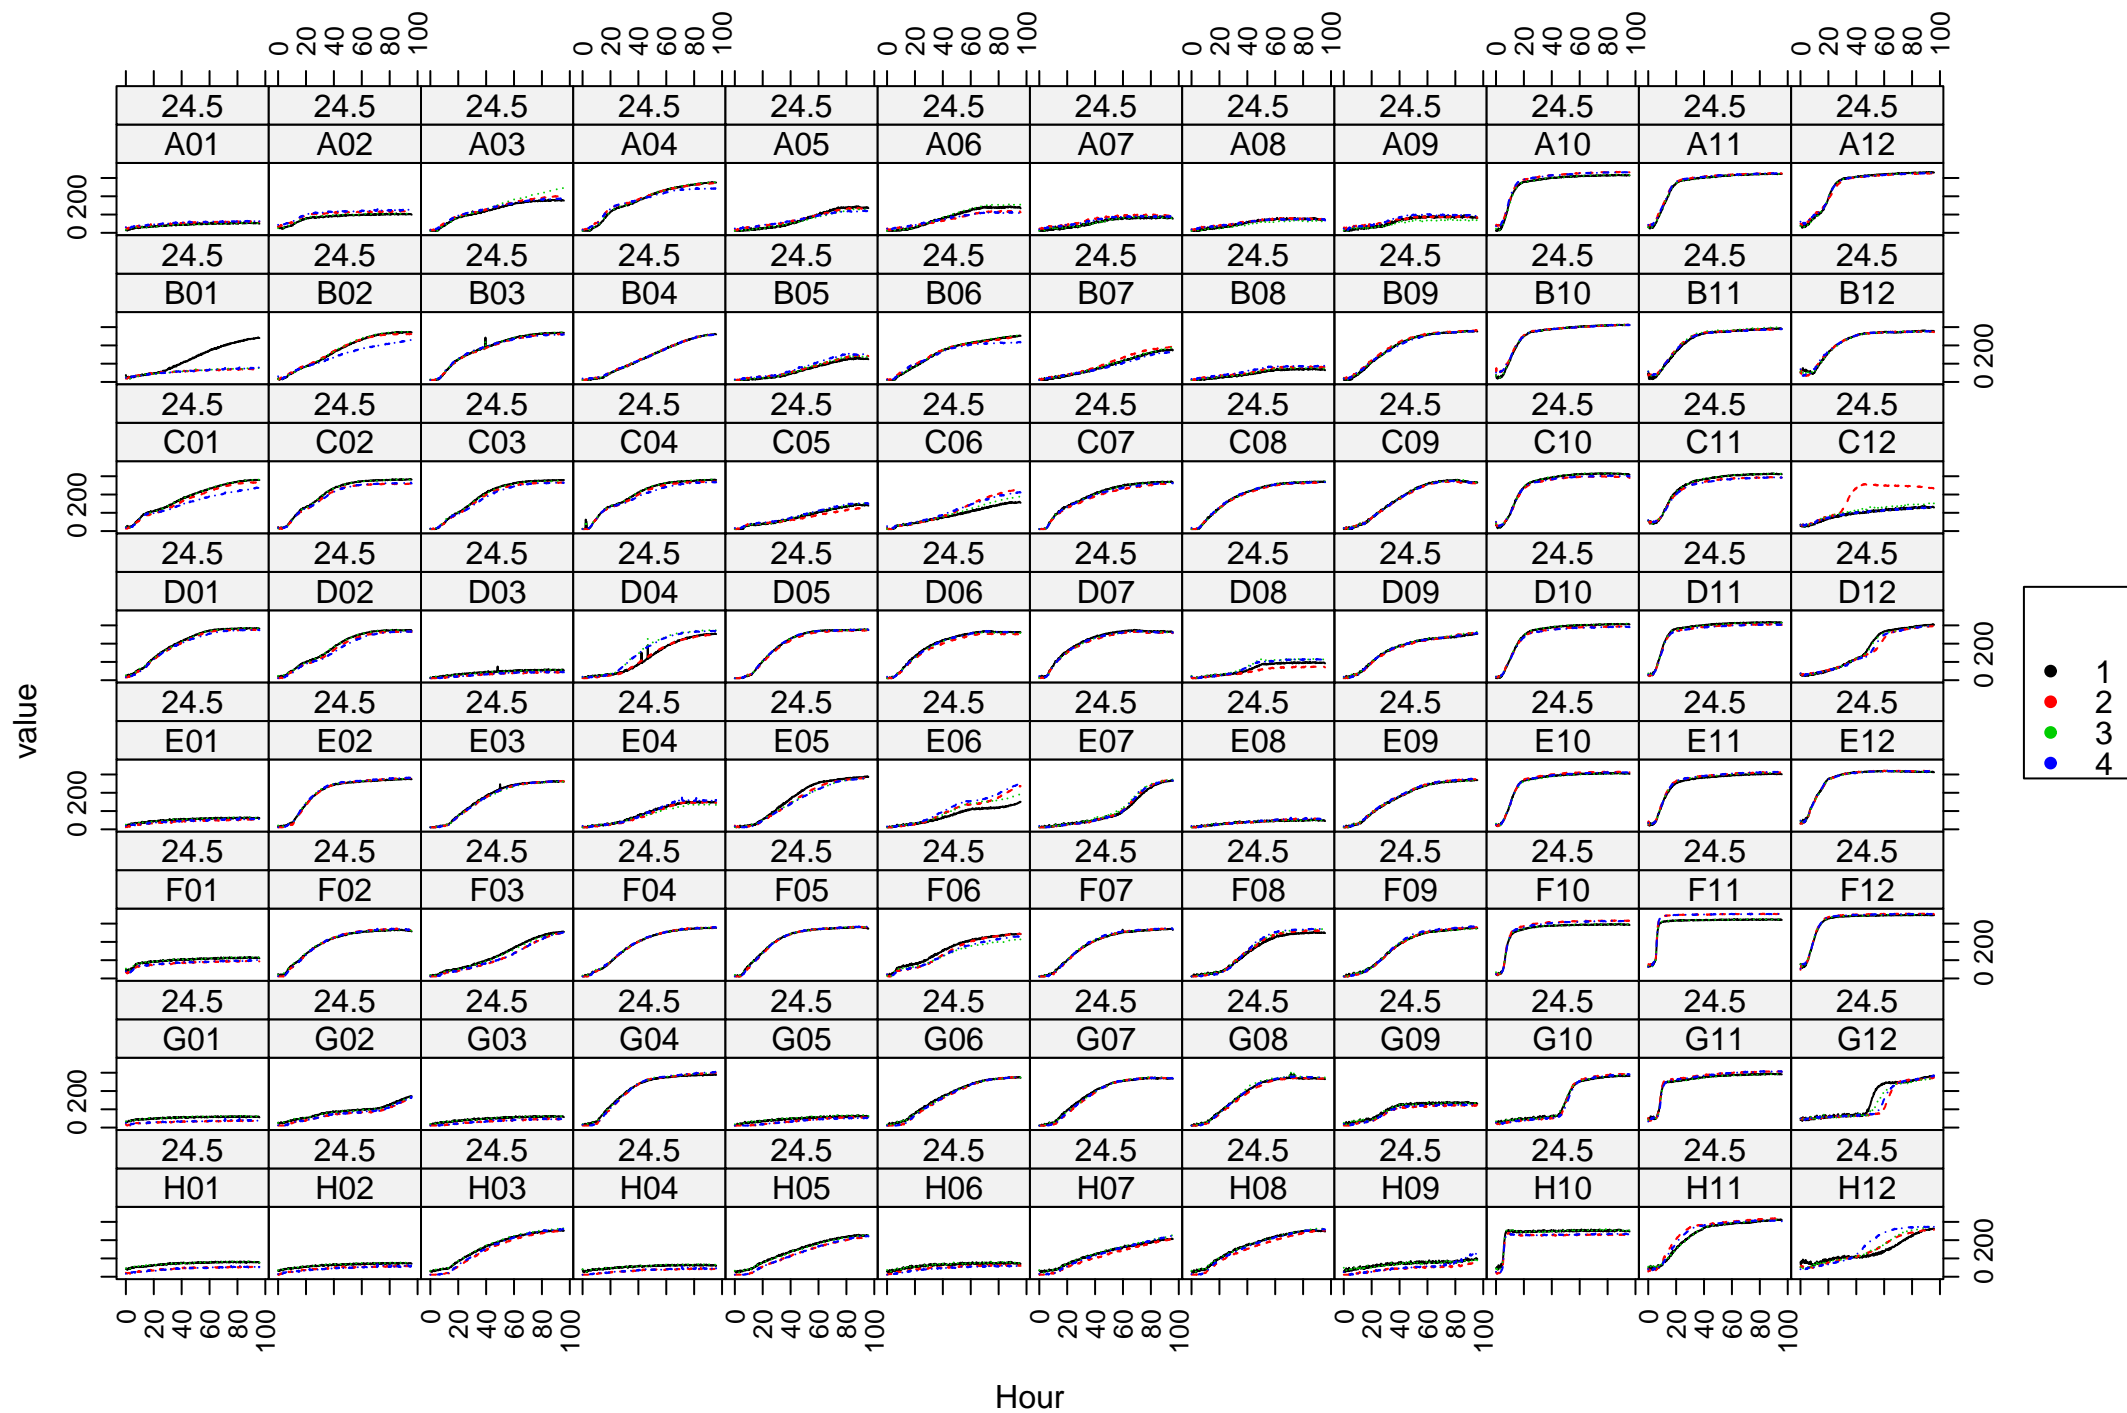

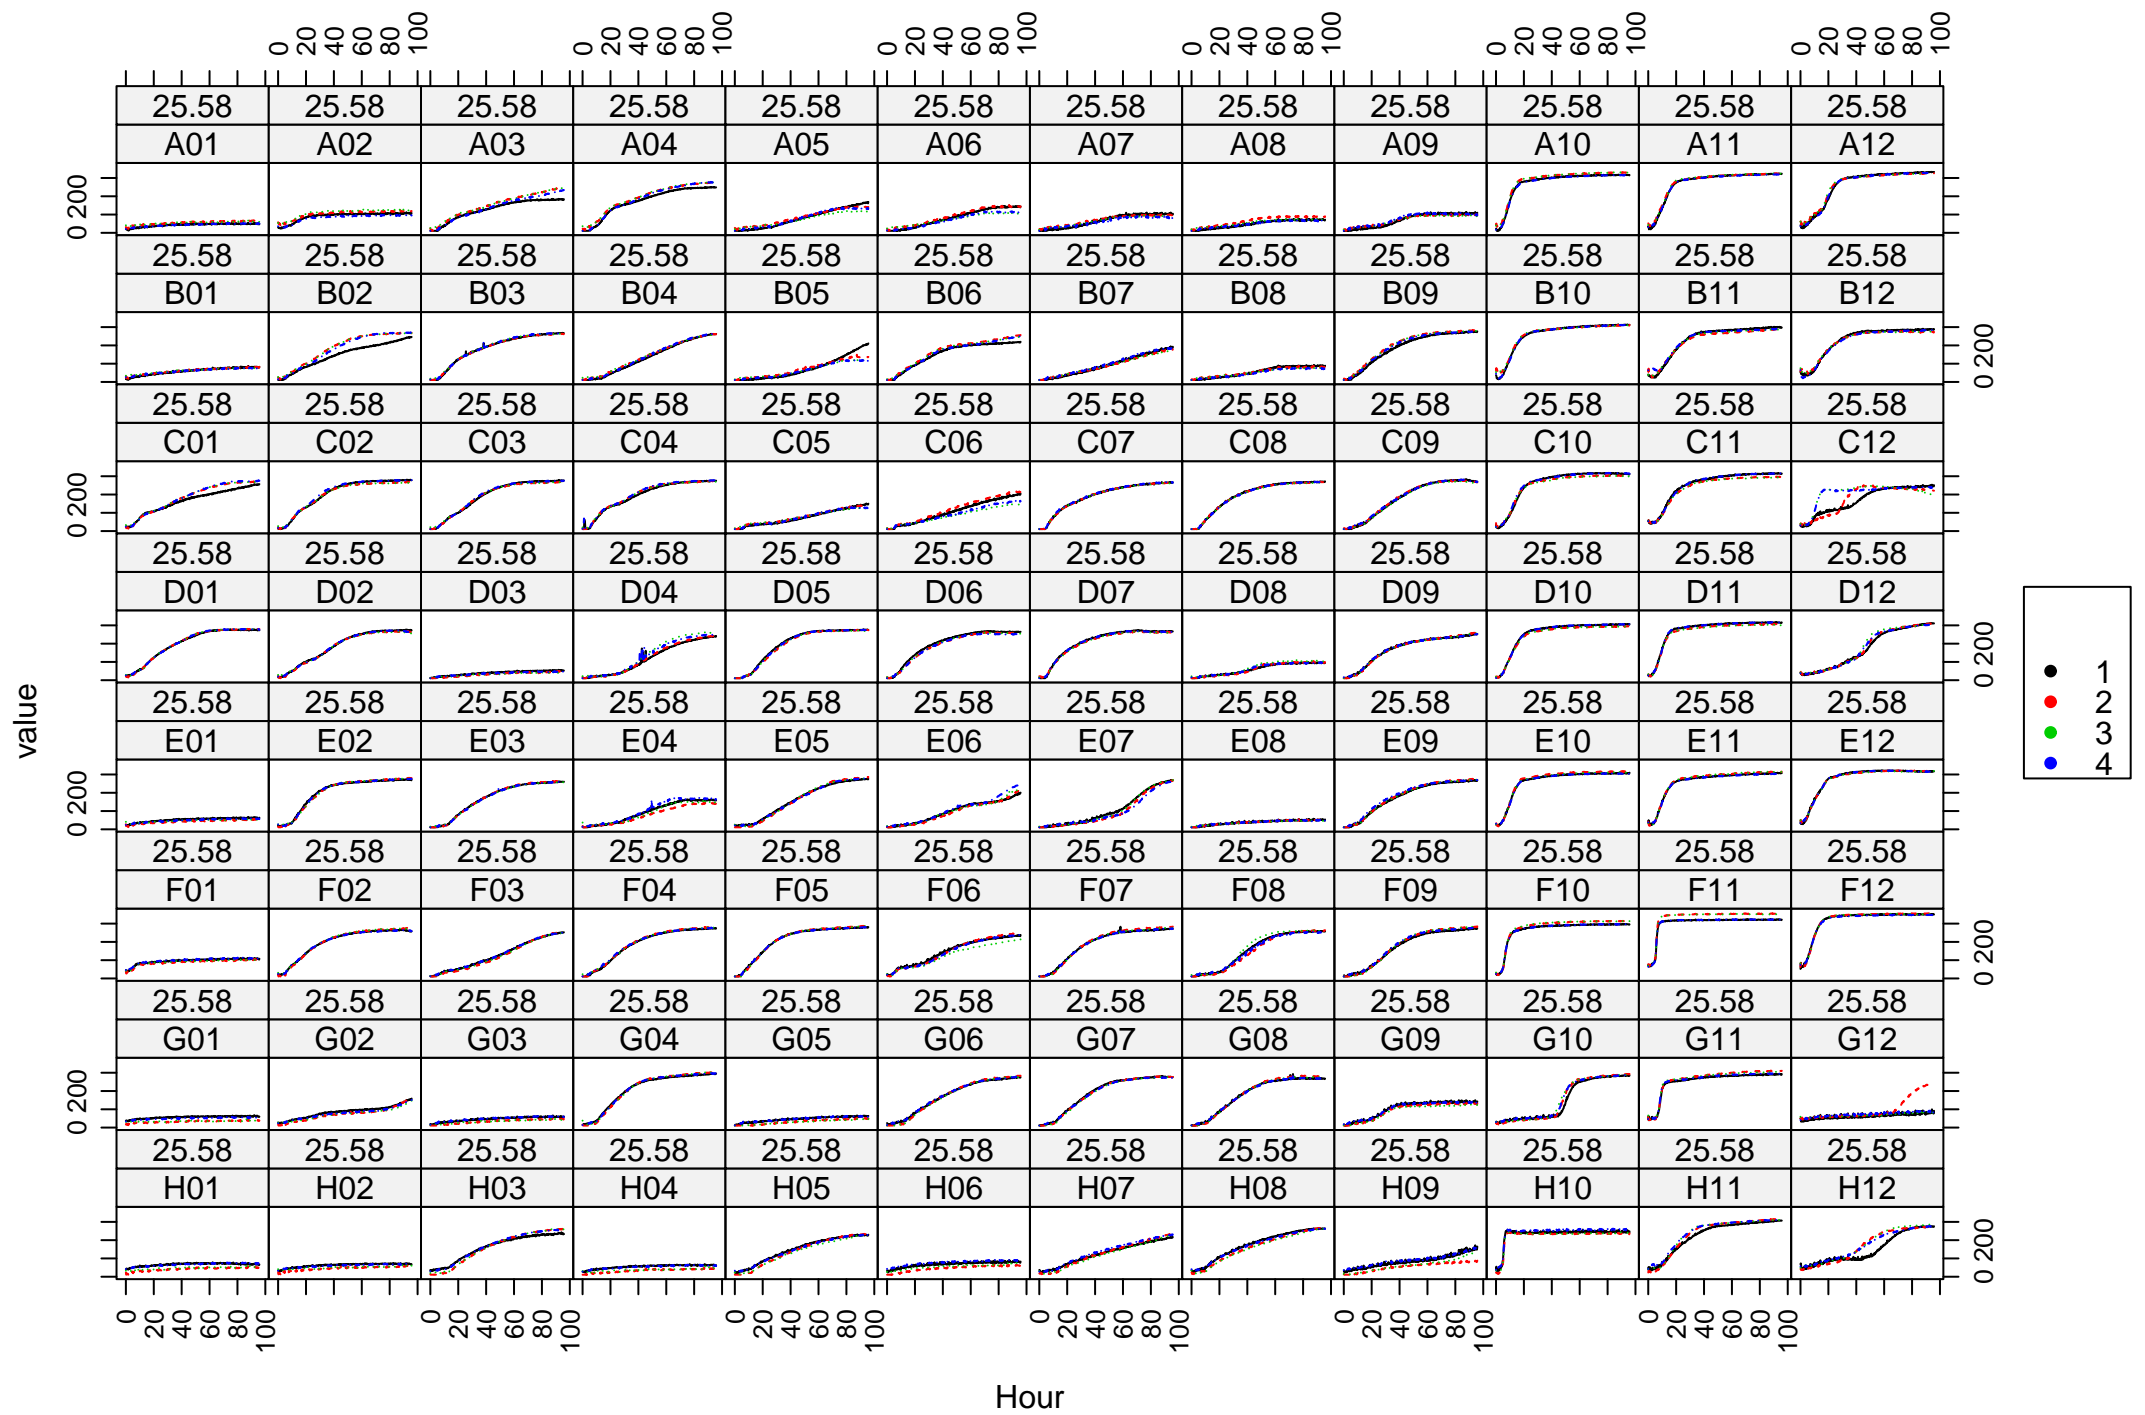



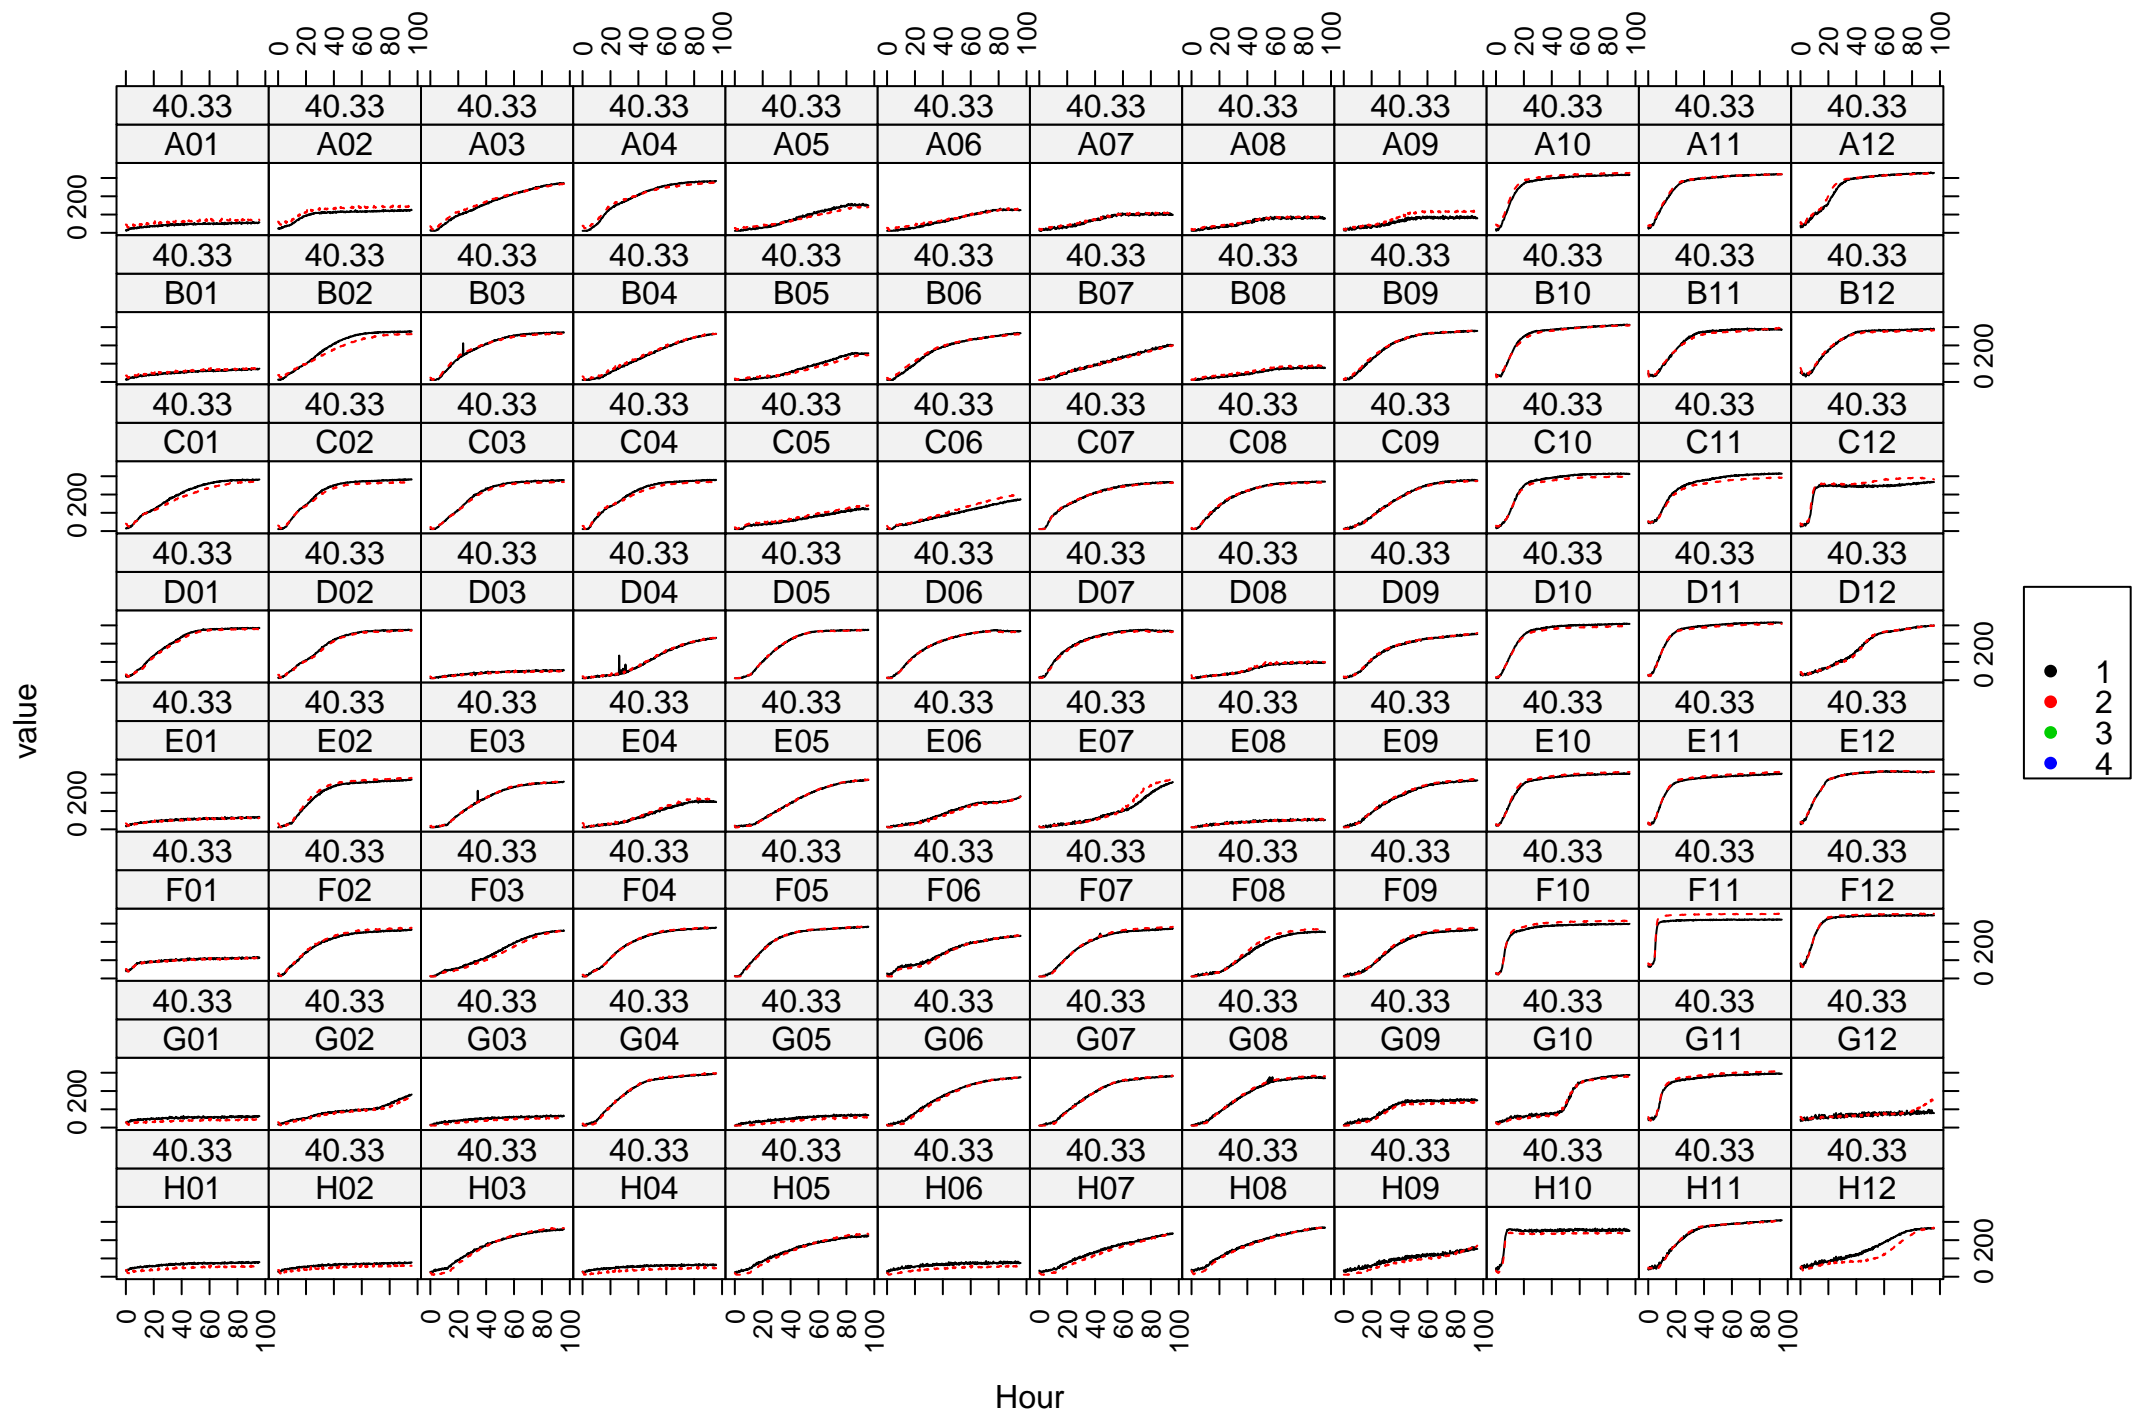

Supplement: pone.0034846.s006.pdf [file pone.0034846.s006.pdf]
